# Supplementary figures and images for: The CB1 Neutral Antagonist AM4113 Retains the Therapeutic Efficacy of the Inverse Agonist Rimonabant for Nicotine Dependence and Weight Loss with Better Psychiatric Tolerability
Source: PubMed Central journal article supplement — Int J Neuropsychopharmacol. 2016 Aug 4;19(12):pyw068. doi: 10.1093/ijnp/pyw068 (PMC5203757; doi:10.1093/ijnp/pyw068), 2016-08-04

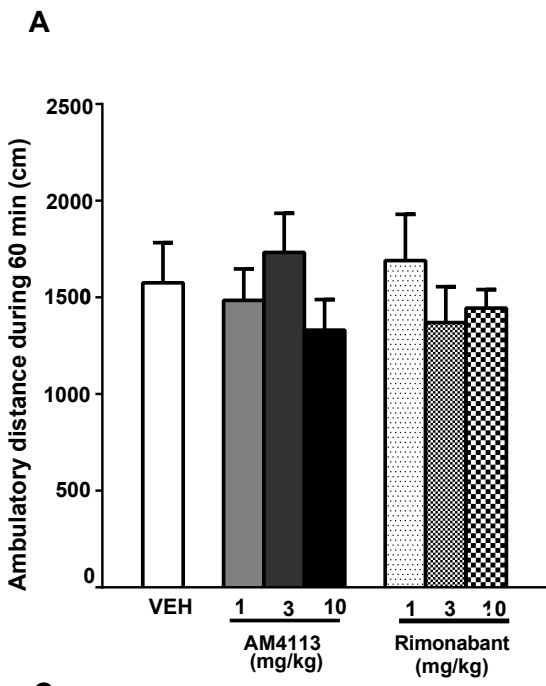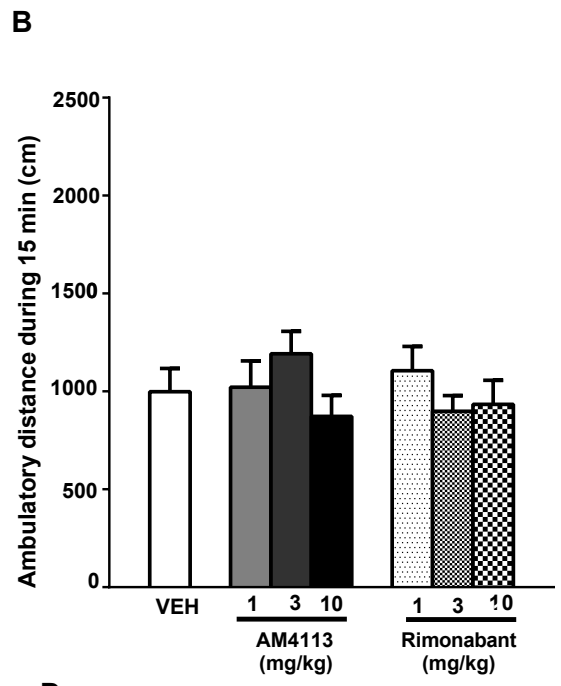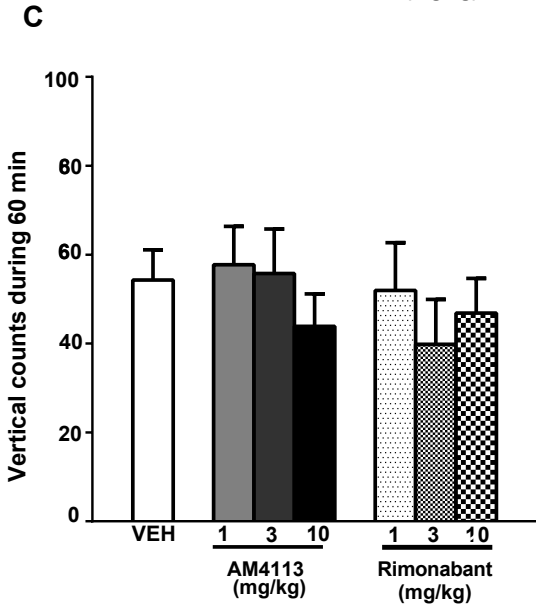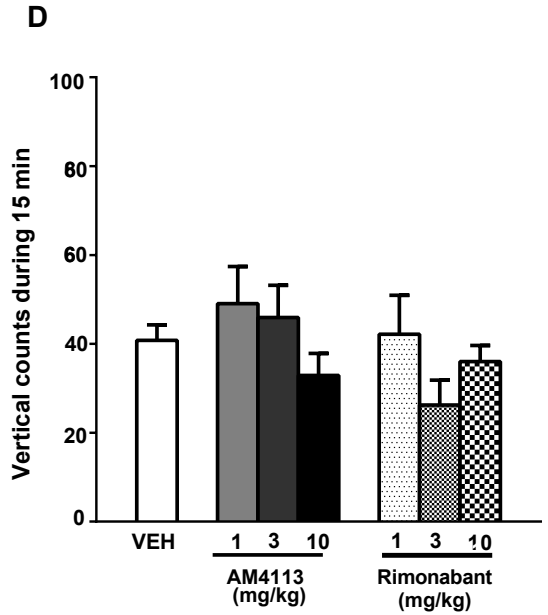

**Figure S2, A,B,C,D**

Supplement: Gueye_et_al_Figure_S2_A__B__C__D.pdf [file Gueye_et_al_Figure_S2_A__B__C__D.pdf]

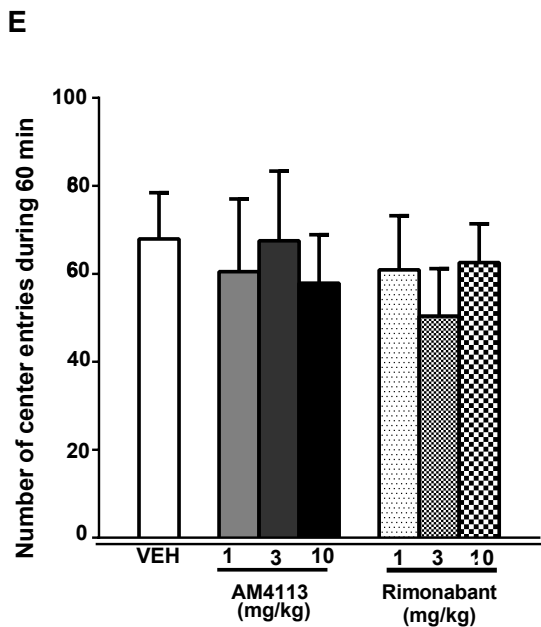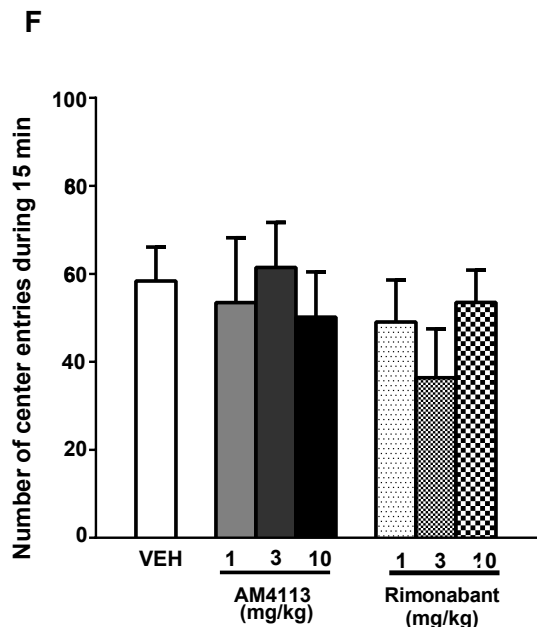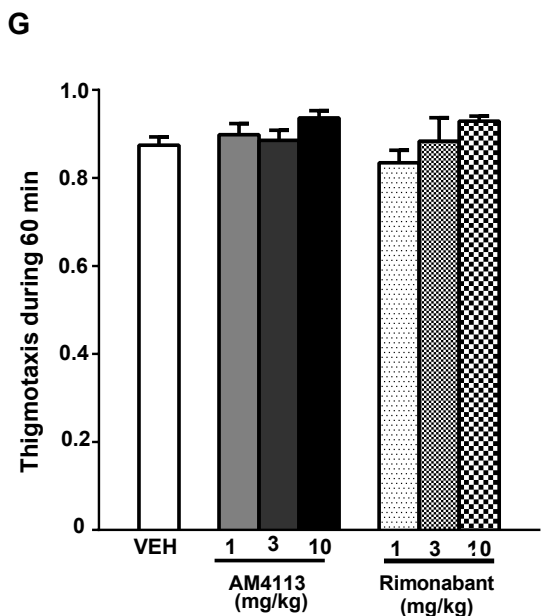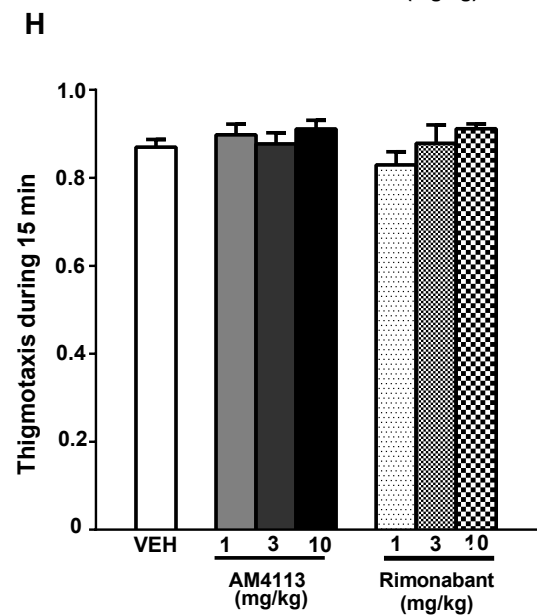

**Figure S2 E, F, G, H**

Supplement: Gueye_et_al_Figure_S2_E__F__G__H.pdf [file Gueye_et_al_Figure_S2_E__F__G__H.pdf]
